# Supplementary material for: Construction of a crystalline Ag(i) coordination polymer based on a new ligand generated from unusual in situ aza-Michael addition reaction
Source: Royal Society of Chemistry journal article supplement (doi:10.1039/c4ce00087k), 2014-01-01

## Electronic Supplementary Information (ESI) for *CrystEngComm*

### Construction of a crystalline Ag(I) coordination polymer based on a new ligand generated from unusual *in situ* aza-Michael addition reaction

Ya-Qin Zhao,<sup>a</sup> Ming-Xiang Fang,<sup>a</sup> Zheng-Hu Xu,<sup>a</sup> Di Sun,<sup>\*a</sup>, Su-Na Wang,<sup>b</sup> Lu-Lu Han,<sup>a</sup> Xiao-Yu Li,<sup>a</sup> Xing-Po Wang,<sup>\*a</sup>

<sup>a</sup>Key Lab of Colloid and Interface Chemistry, Ministry of Education, School of Chemistry and Chemical Engineering, Shandong University, Jinan, Shandong, 250100, China.

E-mail: dsun@sdu.edu.cn, Fax: 86-531-88364218.

<sup>b</sup>Shandong Provincial Key Laboratory of Chemical Energy Storage and Novel Cell Technology, School of Chemistry and Chemical Engineering, Liaocheng University, Liaocheng, P. R. China.

#### Content

|                                                                                                                        |   |
|------------------------------------------------------------------------------------------------------------------------|---|
| (1) Fig. S1: The powder XRD patterns and the simulated one from the single-crystal diffraction data for complex 1..... | 2 |
| (2) Fig. S2: IR spectrum of 1 .....                                                                                    | 2 |

(1) Fig. S1: The powder XRD patterns and the simulated one from the single-crystal diffraction data for complex 1

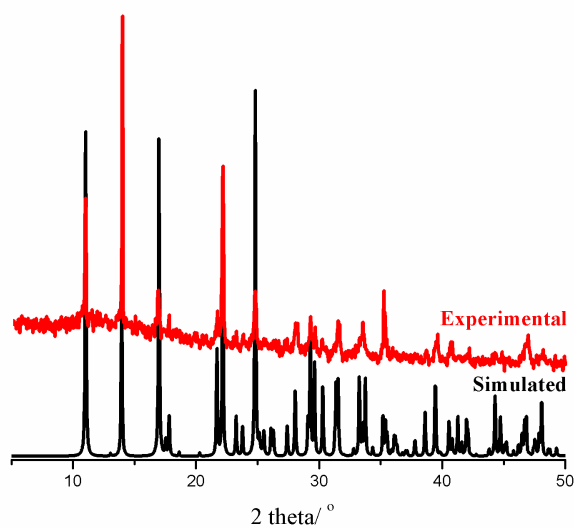

(2) Fig. S2: IR spectrum of 1

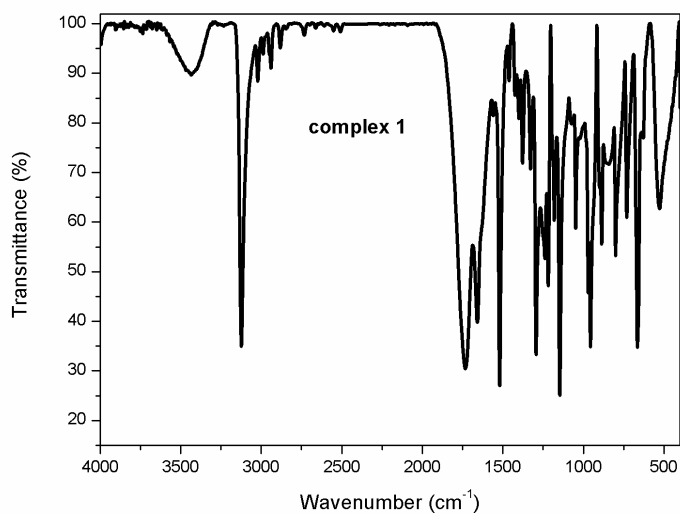

Supplement: c4ce00087k.pdf [file c4ce00087k.pdf]
